# Supplementary material for: The novel S59P mutation in the TNFRSF1A gene identified in an adult onset TNF receptor associated periodic syndrome (TRAPS) constitutively activates NF-κB pathway
Source: PubMed Central journal article supplement (PMC4416318; doi:10.1186/s13075-015-0604-7), 2015-04-03
Supplement: 13075_2015_604_MOESM1_ESM.pdf [file 13075_2015_604_MOESM1_ESM.pdf]

**Table 2. List of primary antibodies used in TNF-R1 signalling study.** All antibodies were rabbit antibodies and were purchased from Cell Signaling Technology.

| <b>TNF receptor 1 pathway</b>                        |          | <b>NF-κB pathway</b>                              |          | <b>PI3K/AKT pathway</b>      |          |
|------------------------------------------------------|----------|---------------------------------------------------|----------|------------------------------|----------|
| Antibody                                             | dilution | Antibody                                          | dilution | Antibody                     | dilution |
| A20/TNFAIP3                                          | 1:150    | IKKα                                              | 1:250    | SHIP2                        | 1:2,000  |
| TRAF2                                                | 1:500    | IKKβ                                              | 1:250    | p-eNOS(Ser <sup>1177</sup> ) | 1:500    |
| p-RIP2(Ser <sup>176</sup> )                          | 1:500    | IKKγ                                              | 1:250    | p-AKT(Thr <sup>308</sup> )   | 1:50     |
|                                                      |          | p-IKKα/β(Ser <sup>176</sup> /Ser <sup>177</sup> ) | 1:250    | p-AKT(Ser <sup>473</sup> )   | 1:25     |
| <b>MAP kinase pathway</b>                            |          | Iκ-Bα                                             | 1:100    | PI3K p100a                   | 1:250    |
| Antibody                                             | dilution | p-Iκ-Bα(Ser <sup>32</sup> )                       | 1:500    | PI3K p85                     | 1:250    |
| p-p38 MAPK(Thr <sup>180</sup> /Tyr <sup>182</sup> )  | 1:1,000  | NF-κB                                             | 1:250    | p-PDK1(Ser <sup>241</sup> )  | 1:500    |
| p-MKK3/MKK6(Ser <sup>189</sup> /Ser <sup>207</sup> ) | 1:100    | p-NF-κB(Ser <sup>536</sup> )                      | 1:100    | p-GSK3b(Ser <sup>9</sup> )   | 1:500    |
| p-HSP27(Ser <sup>82</sup> )                          | 1:50     |                                                   |          | p-PTEN(Ser <sup>380</sup> )  | 1:1,000  |
| <b>c-Jun pathway</b>                                 |          | <b>ERK pathway</b>                                |          | <b>SRC/JAK/STAT pathway</b>  |          |
| Antibody                                             | dilution | Antibody                                          | dilution | Antibody                     | dilution |
| p-SAPK/JNK(Thr <sup>183</sup> /Tyr <sup>185</sup> )  | 1:1,000  | p-c-RAF(Ser <sup>259</sup> )                      | 1:1,000  | p-STAT3(Tyr <sup>705</sup> ) | 1:100    |
| MKK7                                                 | 1:100    | MEK1/2                                            | 1:250    | p-c-SRC(Tyr <sup>416</sup> ) | 1:10,000 |
| p-c-JUN(Ser <sup>63</sup> )                          | 1:200    | p-MEK1/2(Ser <sup>217</sup> /Ser <sup>221</sup> ) | 1:250    | SOCS3                        | 1:500    |
|                                                      |          | p-ERK1/2(Thr <sup>202</sup> /Tyr <sup>204</sup> ) | 1:2,000  | p-JAK2(Tyr <sup>1007</sup> ) | 1:1,000  |
|                                                      |          | □                                                 |          |                              |          |
| <b>IL-1β pathway</b>                                 |          | <b>Inflammasome pathway</b>                       |          | <b>Apoptosis pathway</b>     |          |
| Antibody                                             | dilution | Antibody                                          | dilution | Antibody                     | dilution |
| MyD88                                                | 1:50     | p-STAT1(Tyr <sup>701</sup> )                      | 1:250    | BCL-XL                       | 1:250    |
| p-IRAK1(Thr <sup>209</sup> )                         | 1:3,000  | p-STAT4(Tyr <sup>693</sup> )                      | 1:100    | BCL-2                        | 1:250    |
| TRAF6                                                | 1:500    | ASC                                               | 1:150    | p-BCL-2 (Ser <sup>70</sup> ) | 1:100    |
| p-TAK1(Ser <sup>412</sup> )                          | 1:100    | Caspase 1                                         | 1:250    | p-BAD(Ser <sup>136</sup> )   | 1:500    |
|                                                      |          | CLEAVED Caspase 1(Asp <sup>297</sup> )            | 1:50     |                              |          |
|                                                      |          | NALP1                                             | 1:150    |                              |          |
