# Supplementary material for: The novel S59P mutation in the TNFRSF1A gene identified in an adult onset TNF receptor associated periodic syndrome (TRAPS) constitutively activates NF-κB pathway
Source: PubMed Central journal article supplement (PMC4416318; doi:10.1186/s13075-015-0604-7), 2015-04-03
Supplement: 13075_2015_604_MOESM2_ESM.pdf [file 13075_2015_604_MOESM2_ESM.pdf]

**Table 3. RPPA data obtained from unstimulated, TNF and IL-1 $\beta$  stimulated WT and mutants HEK-293 cells.** For any target, data are reported as mean  $\pm$ SE (two independent experiments) percentage changes in fluorescence intensity with respect WT-HEK293 unstimulated cells. The statistical analysis was made by one-way analysis of variance (ANOVA) and Bonferroni's test for pairwise comparisons. Unstimulated mutants were compared with each other (row ANOVA). Considering each cell line, the results obtained after TNF and IL-1 $\beta$  stimulation were compared with those from unstimulated cells (column ANOVA).

| TNF receptor 1 pathway                                             |                     |                    |                    |                    |                    |                    |
|--------------------------------------------------------------------|---------------------|--------------------|--------------------|--------------------|--------------------|--------------------|
| Target                                                             | Stimulation         | WT Mean $\pm$ SE   | S59P Mean $\pm$ SE | R92Q Mean $\pm$ SE | T50M Mean $\pm$ SE | Row ANOVA          |
| TRAF2                                                              | None                | 100 $\pm$ 0        | 104.83 $\pm$ 4.40  | 83.63 $\pm$ 6.84   | 84.38 $\pm$ 2.97   | F=6.23, p = 0.055. |
|                                                                    | TNF                 | 92.05 $\pm$ 1.30*  | 100.14 $\pm$ 4.51  | 117.53 $\pm$ 1.34* | 96.83 $\pm$ 0.60   |                    |
|                                                                    | IL-1 $\beta$        | 87.48 $\pm$ 0.59*  | 92.56 $\pm$ 2.76   | 105.43 $\pm$ 2.55  | 102.05 $\pm$ 1.83* |                    |
|                                                                    | <b>Column ANOVA</b> | F=59.34, p=0.004   | F=2.43, p=0.236    | F=16.09, p=0.025   | F=19.67, p=0.019   |                    |
| p RIP2 (Ser <sup>176</sup> )                                       | None                | 100 $\pm$ 0        | 150.67 $\pm$ 28.05 | 75.74 $\pm$ 7.09   | 139.39 $\pm$ 21.40 | F=3.73, p = 0.118  |
|                                                                    | TNF                 | 85.50 $\pm$ 9.60   | 123.87 $\pm$ 22.44 | 80.87 $\pm$ 5.00   | 122.30 $\pm$ 6.89  |                    |
|                                                                    | IL-1 $\beta$        | 81.16 $\pm$ 1.99   | 122.24 $\pm$ 2.06  | 81.82 $\pm$ 3.83   | 135.79 $\pm$ 10.83 |                    |
|                                                                    | <b>Column ANOVA</b> | F=3.04, p=0.189    | F=0.59, p=0.607    | F=0.36, p=0.726    | F=0.39, p=0.707    |                    |
| *: p<0.05 with respect to unstimulated cells                       |                     |                    |                    |                    |                    |                    |
| NF- $\kappa$ B pathway                                             |                     |                    |                    |                    |                    |                    |
| Target                                                             | Stimulation         | WT Mean $\pm$ SE   | S59P Mean $\pm$ SE | R92Q Mean $\pm$ SE | T50M Mean $\pm$ SE | Row ANOVA          |
| p IKK $\alpha$ / $\beta$ (Ser <sup>176</sup> /Ser <sup>177</sup> ) | None                | 100 $\pm$ 0        | 87.63 $\pm$ 1.49   | 62.29 $\pm$ 0.38§§ | 91.21 $\pm$ 3.48   | F=72.13, p=0.0006  |
|                                                                    | TNF                 | 90.23 $\pm$ 0.10*  | 93.64 $\pm$ 3.56   | 77.68 $\pm$ 0.09   | 71.28 $\pm$ 2.03   |                    |
|                                                                    | IL-1 $\beta$        | 104.88 $\pm$ 1.04* | 81.08 $\pm$ 3.54   | 76.63 $\pm$ 5.14   | 91.11 $\pm$ 3.21   |                    |
|                                                                    | <b>Column ANOVA</b> | F=152.92, p=0.001* | F=4.30, p=0.131    | F=8.34, p=0.06     | F=14.89, p=0.03    |                    |
| p I $\kappa$ -B $\alpha$ (Ser <sup>32</sup> )                      | None                | 100 $\pm$ 0        | 132.62 $\pm$ 6.16§ | 77.14 $\pm$ 0.75§§ | 115.85 $\pm$ 0.69  | F=57.24, p = 0.001 |
|                                                                    | TNF                 | 88.53 $\pm$ 1.07   | 154.11 $\pm$ 2.50  | 81.59 $\pm$ 7.67   | 74.83 $\pm$ 1.10*  |                    |
|                                                                    | IL-1 $\beta$        | 122.73 $\pm$ 6.98  | 106.03 $\pm$ 0.07* | 79.43 $\pm$ 1.16   | 120.61 $\pm$ 2.52  |                    |
|                                                                    | <b>Column ANOVA</b> | F=18.18, p=0.021   | F=39.39, p=0.007   | F=0.24, p=0.798    | F=235, p<0.001     |                    |
| *: p<0.05 with respect to unstimulated cells                       |                     |                    |                    |                    |                    |                    |
| §: p<0.05 with respect to WT-HEK293 cells                          |                     |                    |                    |                    |                    |                    |
| §§: p<0.05 with respect to WT-HEK293 cells and the other mutants   |                     |                    |                    |                    |                    |                    |
| PI3K/AKT pathway                                                   |                     |                    |                    |                    |                    |                    |
| Target                                                             | Stimulation         | WT Mean $\pm$ SE   | S59P Mean $\pm$ SE | R92Q Mean $\pm$ SE | T50M Mean $\pm$ SE | Row ANOVA          |
| SHIP2                                                              | None                | 100 $\pm$ 0        | 106.74 $\pm$ 10.60 | 72.70 $\pm$ 3.31   | 93.24 $\pm$ 2.44   | F=6.70, p = 0.0487 |
|                                                                    | TNF                 | 87.67 $\pm$ 1.68   | 102.86 $\pm$ 14.04 | 87.82 $\pm$ 5.07   | 99.93 $\pm$ 0.45   |                    |
|                                                                    | IL-1 $\beta$        | 108.08 $\pm$ 17.73 | 95.94 $\pm$ 1.04   | 75.86 $\pm$ 3.75   | 111.59 $\pm$ 5.47  |                    |
|                                                                    | <b>Column ANOVA</b> | F=1.00, p=0.465    | F=0.29, p=0.767    | F=7.54, p=0.067    | F=7.16, p=0.072    |                    |
| p eNOS (Ser <sup>1177</sup> )                                      | None                | 100 $\pm$ 0        | 100.77 $\pm$ 5.23  | 67.57 $\pm$ 0.26§  | 94.68 $\pm$ 1.14   | F=34.28, p=0.0026  |

|                              |                     |                      |                     |                     |                      |                          |
|------------------------------|---------------------|----------------------|---------------------|---------------------|----------------------|--------------------------|
|                              | TNF                 | 86.98±1.01           | 99.04±1.51          | 85.74±2.21*         | 86.66±2.29           |                          |
|                              | IL-1β               | 77.97±3.47*          | 82.17±1.24          | 81.81±1.48*         | 92.84±3.45           |                          |
|                              | <b>Column ANOVA</b> | F=28.18<br>p=0.011   | F=10.16,<br>p=0.046 | F=38.57,<br>p=0.007 | F=2.87,<br>p=0.201   |                          |
| p AKT(Thr <sup>308</sup> )   | None                | 100±0                | 116.36±1.01§§       | 71.95±1.23§§        | 131.94±0.29§§        | F=1007.88,<br>p < 0.0001 |
|                              | TNF                 | 87.56±1.51           | 122.32±9.25         | 84.15±2.64          | 83.24±5.71*          |                          |
|                              | IL-1β               | 112.24±8.22          | 102.84±0.89         | 82.71±2.59          | 121.08±5.36          |                          |
|                              | <b>Column ANOVA</b> | F=6.54,<br>p=0.081   | F=3.42,<br>p=0.168  | F=8.77,<br>p=0.055  | F=31.95,<br>p=0.009  |                          |
| p AKT(Ser <sup>473</sup> )   | None                | 100±0                | 88.67±5.39          | 61.60±1.74§§        | 108.75±5.13          | F=28.75,<br>p=0.0036     |
|                              | TNF                 | 89.06±1.74           | 96.25±0.56          | 71.11±2.71          | 86.53±0.15*          |                          |
|                              | IL-1β               | 85.10±5.08           | 74.25±0.76          | 65.89±2.61          | 106.05±1.21          |                          |
|                              | <b>Column ANOVA</b> | F=6.19,<br>p=0.0861  | F=12.49,<br>p=0.035 | F=3.97,<br>p=0.143  | F=15.88,<br>p=0.025  |                          |
| PI3K p100a                   | None                | 100±0                | 74.87±0.71§         | 74.83±3.14§         | 81.26±2.91§          | F=30.12,<br>p=0.0033     |
|                              | TNF                 | 86.70±1.65*          | 84.11±0.61          | 87.81±5.43          | 76.35±1.72           |                          |
|                              | IL-1β               | 86.93±0.19*          | 62.77±2.27*         | 83.93±1.01          | 82.45±3.38           |                          |
|                              | <b>Column ANOVA</b> | F=63.17,<br>p=0.003  | F=46.74,<br>p=0.005 | F=3.29,<br>p=0.175  | F=1.37,<br>p=0.377   |                          |
| p PDK1 (Ser <sup>241</sup> ) | None                | 100±0                | 108.30±4.42         | 83.43±8.56          | 83.14±1.72           | F=6.55,<br>p=0.051       |
|                              | TNF                 | 84.92±2.73*          | 101.30±1.42         | 99.09±2.79          | 89.16±2.29           |                          |
|                              | IL-1β               | 100.69±1.02          | 83.32±2.12*         | 86.47±4.71          | 103.00±10.64         |                          |
|                              | <b>Column ANOVA</b> | F=28.02,<br>p=0.011  | F=19.16,<br>p=0.019 | F=2.00,<br>p=0.280  | F=2.56,<br>p=0.224   |                          |
| p GSK3β (Ser <sup>9</sup> )  | None                | 100±0                | 102.61±2.54         | 79.10±4.34§§        | 98.72±0.27           | F=18.36,<br>p=0.0084     |
|                              | TNF                 | 92.09±0.72*          | 110.59±2.66         | 87.25±3.57          | 81.72±0.23*          |                          |
|                              | IL-1β               | 106.59±1.16*         | 81.57±1.19*         | 85.07±2.30          | 109.57±2.07*         |                          |
|                              | <b>Column ANOVA</b> | F=84.99,<br>p=0.0023 | F=45.11,<br>p=0.006 | F=0.145,<br>p=0.363 | F=134.44,<br>p=0.001 |                          |
| p PTEN (Ser <sup>380</sup> ) | None                | 100±0                | 136.44±2.48§§       | 88.10±1.68§§        | 101.29±0.97          | F=173.38,<br>p=0.0001.   |
|                              | TNF                 | 92.06±3.62           | 133.26±0.95         | 100.42±7.18         | 90.24±8.60           |                          |
|                              | IL-1β               | 107.04±1.06          | 127.73±3.34         | 95.17±4.82          | 104.18±12.54         |                          |
|                              | <b>Column ANOVA</b> | F=11.85,<br>p=0.037  | F=3.20,<br>p=0.180  | F=1.48,<br>p=0.357  | F=0.70,<br>p=0.563   |                          |

\*: p<0.05 with respect to unstimulated cells

§: p<0.05 with respect to WT-HEK293 cells

§§: p<0.05 with respect to WT-HEK293 cells and the other mutants

#### MAP kinase pathway

| Target                                                | Stimulation         | WT Mean±SE         | S59P Mean±SE        | R92Q Mean±SE       | T50M Mean±SE       | Row ANOVA           |
|-------------------------------------------------------|---------------------|--------------------|---------------------|--------------------|--------------------|---------------------|
| p MKK3/MKK6 (Ser <sup>189</sup> /Ser <sup>207</sup> ) | None                | 100±0              | 165.54±6.30§        | 90.54±3.53         | 136.25±17.37       | F=13.44,<br>p=0.015 |
|                                                       | TNF                 | 84.08±6.52         | 149.70±0.46         | 89.81±1.22         | 94.17±7.11         |                     |
|                                                       | IL-1β               | 80.66±3.79         | 105.92±2.89*        | 79.32±3.52         | 104.25±7.35        |                     |
|                                                       | <b>Column ANOVA</b> | F=5.63,<br>p=0.096 | F=59.22,<br>p=0.003 | F=4.48,<br>p=0.125 | F=3.57,<br>p=0.161 |                     |
| p                                                     | None                | 100±0              | 118.06±4.23         | 83.98±2.83§§       | 117.69±2.82        | F=31.51,            |

|                                                                  |                     |                    |                     |                     |                     |                     |
|------------------------------------------------------------------|---------------------|--------------------|---------------------|---------------------|---------------------|---------------------|
| HSP27(Ser <sup>82</sup> )                                        |                     |                    |                     |                     |                     | p = 0.003           |
|                                                                  | TNF                 | 70.94±6.42         | 106.17±1.17         | 93.79±4.09          | 74.12±4.89*         |                     |
|                                                                  | IL-1β               | 71.81±5.55         | 88.91±0.24*         | 68.17±3.13          | 98.96±0.19          |                     |
|                                                                  | <b>Column ANOVA</b> | F=11.37, p = 0.039 | F=33.38, p=0.009    | F=14.53, p=0.029    | F=44.93, p=0.006    |                     |
| *: p<0.05 with respect to unstimulated cells                     |                     |                    |                     |                     |                     |                     |
| §: p<0.05 with respect to WT-HEK293 cells                        |                     |                    |                     |                     |                     |                     |
| §§: p<0.05 with respect to WT-HEK293 cells and the other mutants |                     |                    |                     |                     |                     |                     |
| <b>c-Jun pathway</b>                                             |                     |                    |                     |                     |                     |                     |
| <b>Target</b>                                                    | <b>Stimulation</b>  | <b>WT Mean±SE</b>  | <b>S59P Mean±SE</b> | <b>R92Q Mean±SE</b> | <b>T50M Mean±SE</b> | <b>Row ANOVA</b>    |
| p SAPK/JNK (Thr <sup>183</sup> /Tyr <sup>185</sup> )             | None                | 100±0              | 138.31±4.39         | 80.56±2.92          | 162.37±13.71§       | F=25.24, p = 0.0046 |
|                                                                  | TNF                 | 136.94±7.15*       | 127.19±4.81         | 101.06±0.61         | 165.68±6.18         |                     |
|                                                                  | IL-1β               | 124.41±1.33        | 241.97±8.16*        | 120.32±8.17*        | 126.82±3.76         |                     |
|                                                                  | <b>Column ANOVA</b> | F=0.65, p =0.583   | F=110.09, p =0.002  | F=15.67, p =0.025   | F=5.79, p=0.093     |                     |
| MKK7                                                             | None                | 100±0              | 131.28±9.89         | 105.29±8.69         | 92.92±17.61         | F=2.31, p = 0.218   |
|                                                                  | TNF                 | 95.22±9.21         | 131.00±0.40         | 111.88±5.49         | 92.21±14.23         |                     |
|                                                                  | IL-1β               | 106.14±7.33        | 122.63±6.08         | 103.05±1.92         | 130.05±10.30        |                     |
|                                                                  | <b>Column ANOVA</b> | F=0.65, p =0.583   | F=0.54, p =0.631    | F=0.58, p =0.613    | F=2.27, p=0.251     |                     |
| *: p<0.05 with respect to unstimulated cells                     |                     |                    |                     |                     |                     |                     |
| §: p<0.05 with respect to WT-HEK293 cells                        |                     |                    |                     |                     |                     |                     |
| <b>ERK pathway</b>                                               |                     |                    |                     |                     |                     |                     |
| <b>Target</b>                                                    | <b>Stimulation</b>  | <b>WT Mean±SE</b>  | <b>S59P Mean±SE</b> | <b>R92Q Mean±SE</b> | <b>T50M Mean±SE</b> | <b>Row ANOVA</b>    |
| p c-RAF (Ser <sup>259</sup> )                                    | None                | 100±0              | 88.24±4.12          | 97.51±8.78          | 92.35±1.31          | F=1.16, p=0.428     |
|                                                                  | TNF                 | 97.54±4.74         | 126.72±4.10         | 103.72±6.02         | 98.39±5.89          |                     |
|                                                                  | IL-1β               | 110.67±9.80        | 79.58±13.87         | 93.70±1.87          | 113.16±0.90         |                     |
|                                                                  | <b>Column ANOVA</b> | F=1.23, p=0.406    | F=8.35, p=0.059     | F=0.66, p=0.580     | F=9.22, p=0.053     |                     |
| MEK1/2                                                           | None                | 100±0              | 110.09±20.87        | 75.36±1.29          | 114.29±10.16        | F=2.25, p=0.224     |
|                                                                  | TNF                 | 80.18±3.71*        | 81.55±3.65          | 82.57±4.38          | 96.61±7.16          |                     |
|                                                                  | IL-1β               | 81.43±1.73*        | 88.65±0.94          | 68.65±14.67         | 99.10±6.22          |                     |
|                                                                  | <b>Column ANOVA</b> | F=22.03, p=0.016   | F=1.47, p=0.358     | F=0.61, p=0.597     | F=1.42, p=0.368     |                     |
| ERK1/2                                                           | None                | 100±0              | 68.44±2.32§§        | 48.36±4.98§§        | 97.06±0.34          | F=79.94, p = 0.0005 |
|                                                                  | TNF                 | 141.22±7.86        | 118.27±2.62 *       | 111.31±6.32*        | 125.87±16.47        |                     |
|                                                                  | IL-1β               | 102.14±14.04       | 85.72±2.94          | 80.59±0.63*         | 112.51±0.19         |                     |
|                                                                  | <b>Column ANOVA</b> | F=6.24, p =0.085   | F=92.06, p=0.002    | F=45.56, p=0.006    | F=2.30, p=0.248     |                     |
| *: p<0.05 with respect to unstimulated cells                     |                     |                    |                     |                     |                     |                     |
| §§: p<0.05 with respect to WT-HEK293 cells and the other mutants |                     |                    |                     |                     |                     |                     |
| <b>SRC/JAK/STAT pathway</b>                                      |                     |                    |                     |                     |                     |                     |
| <b>Target</b>                                                    | <b>Stimulation</b>  | <b>WT Mean±SE</b>  | <b>S59P Mean±SE</b> | <b>R92Q Mean±SE</b> | <b>T50M Mean±SE</b> | <b>Row ANOVA</b>    |
| p STAT3 (Tyr <sup>705</sup> )                                    | None                | 100±0              | 121.57±6.56         | 74.70±6.75§§        | 124.94±2.64         | F=22.55, p =0.006   |
|                                                                  | TNF                 | 92.39±2.52         | 110.43±4.24         | 78.00±6.54          | 85.52±7.68*         |                     |

|                                  |                     |                    |                          |                    |                    |                       |
|----------------------------------|---------------------|--------------------|--------------------------|--------------------|--------------------|-----------------------|
|                                  | IL-1 $\beta$        | 98.44 $\pm$ 11.65  | 111.00 $\pm$ 13.07       | 78.63 $\pm$ 5.33   | 105.79 $\pm$ 0.81  |                       |
|                                  | <b>Column ANOVA</b> | F=0.34,<br>p=0.735 | F=0.51,<br>p=0.645       | F=0.11,<br>p=0.895 | F=17.52<br>p=0.022 |                       |
| p c-SRC<br>(Tyr <sup>416</sup> ) | None                | 100 $\pm$ 0        | 111.73 $\pm$ 18.46       | 82.34 $\pm$ 2.79   | 113.26 $\pm$ 2.81  | F=2.29,<br>p = 0.220. |
|                                  | TNF                 | 73.95 $\pm$ 7.90   | 123.82 $\pm$ 1.92        | 70.67 $\pm$ 4.15   | 105.30 $\pm$ 9.98  |                       |
|                                  | IL-1 $\beta$        | 107.31 $\pm$ 18.92 | 91.07 $\pm$ 12.63        | 73.61 $\pm$ 5.72   | 129.64 $\pm$ 10.56 |                       |
|                                  | <b>Column ANOVA</b> | F=2.19,<br>p=0.258 | F=1.63,<br>p=0.331       | F=1.92,<br>p=0.291 | F=2.11,<br>p=0.268 |                       |
| p JAK2<br>(Tyr <sup>1007</sup> ) | None                | 100 $\pm$ 0        | 139.12 $\pm$ 3.46 $\S\S$ | 94.69 $\pm$ 8.20   | 124.91 $\pm$ 2.91  | F=20.05,<br>p =0.0071 |
|                                  | TNF                 | 96.14 $\pm$ 3.63   | 152.89 $\pm$ 1.88        | 97.02 $\pm$ 4.58   | 104.34 $\pm$ 1.34* |                       |
|                                  | IL-1 $\beta$        | 125.98 $\pm$ 18.37 | 134.04 $\pm$ 3.51        | 92.87 $\pm$ 7.84   | 124.06 $\pm$ 1.28  |                       |
|                                  | <b>Column ANOVA</b> | F=2.25,<br>p=0.252 | F=10.26,<br>p=0.046      | F=0.09,<br>p=0.919 | F=34.14<br>p=0.009 |                       |

\*: p<0.05 with respect to unstimulated cells

$\S\S$ : p<0.05 with respect to WT-HEK293 cells and the other mutants

| IL-1 $\beta$ pathway            |                     |                       |                          |                       |                       |                      |
|---------------------------------|---------------------|-----------------------|--------------------------|-----------------------|-----------------------|----------------------|
| Target                          | Stimulation         | WT<br>Mean $\pm$ SE   | S59P<br>Mean $\pm$ SE    | R92Q<br>Mean $\pm$ SE | T50M<br>Mean $\pm$ SE | Row<br>ANOVA         |
| MyD88                           | None                | 100 $\pm$ 0           | 115.71 $\pm$ 8.15        | 81.08 $\pm$ 8.7       | 118.40 $\pm$ 9.89     | F=4.92,<br>p = 0.078 |
|                                 | TNF                 | 90.82 $\pm$ 5.10      | 118.01 $\pm$ 0.14        | 99.24 $\pm$ 15.85     | 91.30 $\pm$ 11.97     |                      |
|                                 | IL-1 $\beta$        | 105.30 $\pm$ 1.27     | 90.62 $\pm$ 0.67         | 99.30 $\pm$ 3.43      | 100.85 $\pm$ 3.86     |                      |
|                                 | <b>Column ANOVA</b> | F=5.82,<br>p = 0.092. | F=10.37<br>P = 0.045     | F=0.98,<br>p = 0.470. | F=2.21<br>P = 0.257.  |                      |
| TRAF6                           | None                | 100 $\pm$ 0           | 107.96 $\pm$ 5.98        | 95.85 $\pm$ 17.19     | 109.94 $\pm$ 15.83    | F=0.30,<br>p < 0.823 |
|                                 | TNF                 | 93.42 $\pm$ 3.85      | 113.02 $\pm$ 16.83       | 115.97 $\pm$ 5.02     | 102.77 $\pm$ 9.47     |                      |
|                                 | IL-1 $\beta$        | 99.45 $\pm$ 0.53      | 78.89 $\pm$ 0.80         | 79.17 $\pm$ 0.12      | 110.65 $\pm$ 16.32    |                      |
|                                 | <b>Column ANOVA</b> | F=2.64, p=0.218       | F=3.18,<br>p=0.181       | F=3.18, p=0.181       | F=0.09,<br>p=0.913    |                      |
| p TAK1<br>(Ser <sup>412</sup> ) | None                | 100 $\pm$ 0           | 126.38 $\pm$ 4.91 $\S\S$ | 92.94 $\pm$ 4.86      | 107.26 $\pm$ 3.26     | F=14.2,<br>p<0.013   |
|                                 | TNF                 | 87.02 $\pm$ 2.59*     | 123.98 $\pm$ 9.60        | 109.57 $\pm$ 2.79     | 78.26 $\pm$ 3.68      |                      |
|                                 | IL-1 $\beta$        | 100.97 $\pm$ 0.20     | 127.52 $\pm$ 8.09        | 95.24 $\pm$ 4.24      | 130.53 $\pm$ 23.09    |                      |
|                                 | <b>Column ANOVA</b> | F=27.05,<br>p=0.01 *  | F=0.05,<br>p=0.948       | F=4.93, p=0.112       | F=3.69,<br>p=0.155    |                      |

\*: p<0.05 with respect to unstimulated cells

$\S\S$ : p<0.05 with respect to WT-HEK293 cells and the other mutants

| Inflammasome pathway             |                     |                     |                       |                       |                       |                      |
|----------------------------------|---------------------|---------------------|-----------------------|-----------------------|-----------------------|----------------------|
| Target                           | Stimulation         | WT<br>Mean $\pm$ SE | S59P<br>Mean $\pm$ SE | R92Q<br>Mean $\pm$ SE | T50M<br>Mean $\pm$ SE | Row<br>ANOVA         |
| p STAT1<br>(Tyr <sup>701</sup> ) | None                | 100 $\pm$ 0         | 154.07 $\pm$ 6.58     | 90.77 $\pm$ 16.21     | 120.55 $\pm$ 18.73    | F=4.79,<br>p = 0.082 |
|                                  | TNF                 | 104.07 $\pm$ 8.64   | 134.38 $\pm$ 4.18     | 92.22 $\pm$ 0.17      | 108.37 $\pm$ 11.03    |                      |
|                                  | IL-1 $\beta$        | 101.00 $\pm$ 14.91  | 110.08 $\pm$ 13.86    | 94.57 $\pm$ 10.09     | 131.13 $\pm$ 3.49     |                      |
|                                  | <b>Column ANOVA</b> | F=0.05,<br>p=0.956  | F=5.76,<br>p=0.093    | F=0.03,<br>p=0.970    | F=0.80,<br>p=0.525    |                      |
| p STAT4<br>(Tyr <sup>693</sup> ) | None                | 100 $\pm$ 0         | 116.26 $\pm$ 5.29     | 63.24 $\pm$ 1.21      | 109.90 $\pm$ 15.47    | F=8.36,<br>p = 0.034 |
|                                  | TNF                 | 81.09 $\pm$ 3.41    | 93.54 $\pm$ 12.93     | 61.41 $\pm$ 2.24      | 82.37 $\pm$ 2.76      |                      |
|                                  | IL-1 $\beta$        | 76.51 $\pm$ 16.10   | 130.31 $\pm$ 9.75     | 70.73 $\pm$ 3.10      | 89.46 $\pm$ 11.80     |                      |

|                                         |                     |                    |                     |                     |                     |                        |
|-----------------------------------------|---------------------|--------------------|---------------------|---------------------|---------------------|------------------------|
|                                         | <b>Column ANOVA</b> | F=1.72,<br>p=0.318 | F=3.56,<br>p=0.161  | F=4.56,<br>p=0.123  | F=1.59,<br>p=0.338  |                        |
| ASC                                     | None                | 100±0              | 114.26±1.29         | 95.99±1.91          | 103.04±7.56         | F=3.94,<br>p = 0.109   |
|                                         | TNF                 | 83.05±3.81         | 103.79±0.25*        | 87.58±4.69          | 92.98±1.31          |                        |
|                                         | IL-1β               | 88.31±6.49         | 80.96±1.14*         | 83.14±6.60          | 126.28±1.75         |                        |
|                                         | <b>Column ANOVA</b> | F=3.99,<br>p=0.142 | F=286.3,<br>p<0.001 | F1.84, p=0.301      | F=14.15,<br>p=0.029 |                        |
| CLEAVED Caspase 1 (Asp <sup>297</sup> ) | None                | 100±0              | 93.11±0.82          | 80.32±0.70          | 116.22±6.41§§       | F=21.17,<br>p = 0.0064 |
|                                         | TNF                 | 100.63±0.77        | 104.78±9.17         | 86.83±0.45*         | 113.89±8.32         |                        |
|                                         | IL-1β               | 102.07±12.18       | 71.40±2.85          | 87.12±0.50*         | 124.48±5.13         |                        |
|                                         | <b>Column ANOVA</b> | F=0.02,<br>p=0.97  | F=9.27,<br>p=0.052  | F=46.74,<br>p=0.005 | F=0.68,<br>p=0.570  |                        |
| NALP1                                   | None                | 100±0              | 80.35±2.49          | 83.77±1.49          | 107.07±7.11         | F=11.12,<br>p = 0.021  |
|                                         | TNF                 | 79.08±0.45         | 81.87±10.87         | 94.48±9.96          | 92.26±7.58          |                        |
|                                         | IL-1β               | 93.05±9.61         | 71.74±0.33          | 84.68±2.21          | 94.95±3.32          |                        |
|                                         | <b>Column ANOVA</b> | F=3.68,<br>p=0.156 | F=0.72,<br>p=0.555  | F=1.0,<br>p=0.466   | F=1.57,<br>p=0.341  |                        |

\*: p<0.05 with respect to unstimulated cells

§§: p<0.05 with respect to WT-HEK293 cells and the other mutants

#### Apoptosis pathway

| Target                     | Stimulation         | WT Mean±SE          | S59P Mean±SE        | R92Q Mean±SE         | T50M Mean±SE         | Row ANOVA            |
|----------------------------|---------------------|---------------------|---------------------|----------------------|----------------------|----------------------|
| BCL-XL                     | None                | 100±0               | 89.43±1.15          | 67.72±1.03           | 123.23±25.32         | F=331,<br>p = 0.138  |
|                            | TNF                 | 83.96±1.10          | 87.61±3.27          | 57.17±8.14           | 80.51±0.12           |                      |
|                            | IL-1β               | 79.59±10.30         | 64.64±0.39*         | 66.45±2.71           | 101.02±6.86          |                      |
|                            | <b>Column ANOVA</b> | F=3.23,<br>p=0.178  | F=46.98,<br>p=0.005 | F=1.33,<br>p = 0.385 | F=1.99,<br>p = 0.282 |                      |
| BCL-2                      | None                | 100±0               | 239.33±91.70        | 218.77±3.05          | 157.74±0.62          | F=1.89,<br>p = 0.009 |
|                            | TNF                 | 174.08±7.87*        | 343.89±19.40        | 200.20±12.80         | 168.42±21.32         |                      |
|                            | IL-1β               | 195.70±11.39*       | 399.19±26.65        | 166.82±6.30          | 154.05±9.71          |                      |
|                            | <b>Column ANOVA</b> | F=39.42,<br>p=0.007 | F=2.08,<br>p=0.270  | F=9.77,<br>p=0.048   | F=0.30,<br>p = 0.758 |                      |
| p BAD(Ser <sup>136</sup> ) | None                | 100±0               | 161.93±23.41        | 99.70±2.10           | 113.94±14.25         | F=4.59,<br>p = 0.087 |
|                            | TNF                 | 86.64±6.17          | 128.96±0.34         | 111.27±3.75          | 108.46±0.67          |                      |
|                            | IL-1β               | 96.45±14.60         | 107.88±3.75         | 95.98±3.34           | 149.82±27.75         |                      |
|                            | <b>Column ANOVA</b> | F=0.57,<br>p=0.616  | F=3.96,<br>p=0.144  | F=6.43,<br>p=0.082   | F=1.56,<br>p=0.344   |                      |

\*: p<0.05 with respect to unstimulated cells
